# Supplementary material for: Synthesis and soft crystal structure-induced broad emission of (NH3C6H12NH3)InBr5·2H2O
Source: Royal Society of Chemistry journal article supplement (doi:10.1039/d4cc01822b), 2024-01-01
Supplement: d4cc01822b1.pdf [file d4cc01822b1.pdf]

Supporting Information

**Synthesis and Soft Crystal Structure-Induced Broad Emission in  
(NH<sub>3</sub>C<sub>6</sub>H<sub>12</sub>NH<sub>3</sub>)InBr<sub>5</sub>·2H<sub>2</sub>O**

Shuva Biswas,<sup>a#</sup> Arnab Mandal,<sup>a#</sup> Diptikanta Swain,<sup>b</sup> and Kanishka Biswas<sup>a,\*</sup>

<sup>a</sup>New Chemistry Unit, International Centre for Materials Science and School of Advanced Materials, Jawaharlal Nehru Centre for Advanced Scientific Research (JNCASR), Jakkur P. O., Bangalore 560064, India.

<sup>b</sup>Institute of Chemical Technology-IndianOil Odisha Campus, Bhubaneswar 751013, India.

# S.B. and A.M. contributed equally.

\*Corresponding author.

E-mail for correspondence: [kanishka@jncasr.ac.in](mailto:kanishka@jncasr.ac.in)

## Methods.

### Chemicals and materials

Hydrobromic acid (HBr, 47 wt % in H<sub>2</sub>O, Spectrochem), indium acetate [In(OAc)<sub>3</sub>, Sigma-Aldrich], 1,5-diamino-2-methylpentane (NH<sub>2</sub>C<sub>6</sub>H<sub>12</sub>NH<sub>2</sub>, 99%, Sigma-Aldrich) and n-hexane (SDFCL, 99%) were used without further purification.

### Synthesis of (NH<sub>3</sub>C<sub>6</sub>H<sub>12</sub>NH<sub>3</sub>)InBr<sub>5</sub>·2H<sub>2</sub>O

1 mmol In(OAc)<sub>3</sub> powder was dissolved in 2 mL of concentrated HBr solution under vigorous stirring at 60 °C for 15 min followed by the addition of 1 mmol 1,5-diamino-2-methylpentane (5P1). The mixture was stirred at 110 °C for 30 min to obtain a colourless solution. After slow cooling, the colourless (5P1)InBr<sub>5</sub>·2H<sub>2</sub>O crystals were obtained. The product was filtered by a Whatman filter paper and washed with hexane to remove residual acid.

### Single crystal X-ray diffraction (SCXRD).

Single crystal data were collected in two different temperatures such as low temperature (127 K) and room temperature (296 K) from Bruker D8 Venture diffractometer equipped with a Photon detector and graphite monochromatic Mo K<sub>α</sub> radiation (λ = 0.71073 Å, 50 kV, 1 mA). The raw data was collected, reduced and integrated using APEX III Software. The structure was solved using SHELXS and refined by using SHELXL included in the WinGXsuite.<sup>S1-S3</sup>

The degrees of distortion of the octahedra were calculated based on the following equations:<sup>S4</sup>

$$\lambda_{\text{oct}} = 1/6 \sum_{n=1}^6 \left[ \frac{d_n - d_0}{d_0} \right]^2 \quad (\text{S1})$$

$$\sigma^2 = 1/11 \sum_{n=0}^{12} (\theta_n - 90^\circ)^2 \quad (\text{S2})$$

where  $d_0$  represents the average bond distance,  $d_n$  denotes six individual bond distances and  $\theta_n$  implies the bond angles.

### Powder X-ray diffraction (PXRD)

Rigaku Smart Lab diffractometer was used to collect room temperature PXRD patterns using Cu K<sub>α</sub> radiation (λ = 1.5406 Å) with an accelerating voltage of 40 kV (current of 30 mA). For the phase transition study, the low temperature PXRD data were collected on a Bruker D8 Advance X-Ray diffractometer by using Cu K<sub>α</sub> radiation (λ = 1.5406 Å) equipped with a PheniX Oxford closed cycle helium cryostat with a temperature stability of 0.1 K.

### **Optical spectroscopy**

Diffuse reflectance measurements were carried out to estimate the optical band gap for solid samples in the range of 250–800 nm by using a Perkin-Elmer Lambda 900 UV/vis/near-IR spectrometer in the reflectance mode. By using the Kubelka–Munk equation, absorption ( $\alpha/S$ ) data were calculated from the reflectance data:<sup>S5</sup>

$$\frac{\alpha}{S} = \frac{(1-R)^2}{2R} \quad (\text{S3})$$

where  $R$  is the reflectance and  $\alpha$  and  $S$  are the absorption and scattering coefficients, respectively. The band gaps for the solid sample were derived from  $\alpha/S$  vs energy (eV) plots.

### **Thermogravimetric analysis (TGA)**

Thermogravimetric analysis was carried out using a 2 STAR TGA instrument, in which the samples were heated in  $\text{N}_2$  atmosphere ( $40 \text{ mL min}^{-1}$ ) at a rate of  $5 \text{ }^\circ\text{C min}^{-1}$  in the temperature range of  $40 - 600 \text{ }^\circ\text{C}$ .

### **Field emission scanning electron microscopy (FESEM)**

FESEM images in backscattered mode, SEM-EDAX colour mapping and EDS spectra mapping were acquired using Thermo Fisher (FEI) Apreo 2 S field emission scanning electron microscope (FESEM) using a T1 detector.

### **Raman spectroscopy**

Raman spectroscopy measurements of the  $(5\text{P1})\text{InBr}_5 \cdot 2\text{H}_2\text{O}$  powder sample was carried out in the range of  $50\text{-}300 \text{ cm}^{-1}$  with a Renishaw spectrometer. The excitation wavelength of the laser was 532 nm.

### **X-ray photoelectron spectroscopy (XPS)**

X-ray photoelectron spectroscopy (XPS) measurement for the  $(5\text{P1})\text{InBr}_5 \cdot 2\text{H}_2\text{O}$  sample was accomplished with a Thermo Scientific spectrometer using an  $\text{Al-K}\alpha$  (1.487 keV) X-ray monochromatic source with variable spot size possessing a relative composition detection better than 0.1%.

## Photoluminescence spectroscopy

All PL and PL excitation characterizations of (5P1)InBr<sub>5</sub>·2H<sub>2</sub>O solid samples were recorded on an Edinburgh FLS1000 spectrofluorometer coupled with pulsed Xenon microsecond flash-lamp. Temperature-dependent PL measurements ranging from 75 to 300 K were carried out by using a vacuum-closed cycle refrigerator cryostat.

The peak shift of the STE with temperature was explained with the following equation by consideration of the competing effect between thermal expansion ( $A_{TE}$ ) and electron-phonon interactions ( $A_{EP}$ ):<sup>S6</sup>

$$E(T) = E_0 + A_{TE}T + A_{EP} \left( \frac{2}{\exp\left[\frac{\hbar\omega}{k_B T}\right] - 1} + 1 \right) \quad (S4)$$

where  $E_0$  represents the unrenormalized bandgap, which is defined as  $E_0 = E(0) - A_{EP}$  [ $E(0)$  = band gap at 0K].  $A_{TE}$  and  $A_{EP}$  are the contributions for thermal expansion (TE) and electron phonon (EP) interactions, respectively.

## Heat capacity measurement and data fitting

Temperature-dependent (2-300 K) heat capacity ( $C_p$ ) of (5P1)InBr<sub>5</sub>·2H<sub>2</sub>O was measured using Dynacool, Quantum Design Physical Property Measurement System (PPMS).

To experimentally validate the presence of low-frequency optical phonons in (5P1)InBr<sub>5</sub>·2H<sub>2</sub>O, low-temperature (2-30 K) heat capacity ( $C_p$ ) data has been fitted using Debye-Einstein model (Equation S5):<sup>S7</sup>

$$\frac{C_p}{T} = \gamma + \beta T^2 + \sum_n \left( A_n (\theta_{E_n})^2 \cdot (T^2)^{-\frac{3}{2}} \cdot \frac{e^{\frac{\theta_{E_n}}{T}}}{\left( e^{\frac{\theta_{E_n}}{T}} - 1 \right)^2} \right) \quad (S5)$$

Here,  $\gamma$  represents the Sommerfeld coefficient reflecting the electronic contributions of  $C_p$ . The second term,  $\beta = B(12\pi^4 N_A \kappa_B / 5) (\Theta_D)^{-3}$  denotes the contributions from the Debye lattice, whereas  $N_A$ ,  $\Theta_D$  and  $\kappa_B$  are Avogadro number, Debye temperature and Boltzmann constant respectively.  $B = 1 - \sum_n A_n / 3NR$ , where  $R$  symbolizes the universal gas constant, and  $N$  is the number of atoms per formula unit. The third term in equation S5 comprised of the contribution from the independent localized Einstein oscillators contributing to the total heat capacity.  $A_n$  and  $\Theta_{E_n}$  represent the pre-factor and the Einstein temperature respectively for the  $n^{\text{th}}$  Einstein mode.

### Sound velocity measurement

The longitudinal ( $v_l$ ) and transverse ( $v_t$ ) sound velocities were measured on a disc-shaped sample by using an Epoch 650 Ultrasonic Flaw Detector (Olympus) instrument with a transducer frequency of 5 MHz.

The Poisson's ratio ( $\nu_p$ ) is linked with the sound velocities by the following equation:<sup>S8</sup>

$$\nu_p = \frac{1-2\left(\frac{v_t}{v_l}\right)^2}{2-2\left(\frac{v_t}{v_l}\right)^2} \quad (\text{S6})$$

Grüneisen parameter ( $\gamma$ ) was calculated using the following equation:<sup>S8</sup>

$$\gamma = \frac{3}{2} \cdot \frac{1+\nu_p}{2-3\nu_p} \quad (\text{S7})$$

The mean sound velocity ( $v_m$ ) was calculated using the following formula:<sup>S8</sup>

$$v_m = \left( \frac{3}{v_l^{-3} + 2v_t^{-3}} \right)^{\frac{1}{3}} \quad (\text{S8})$$

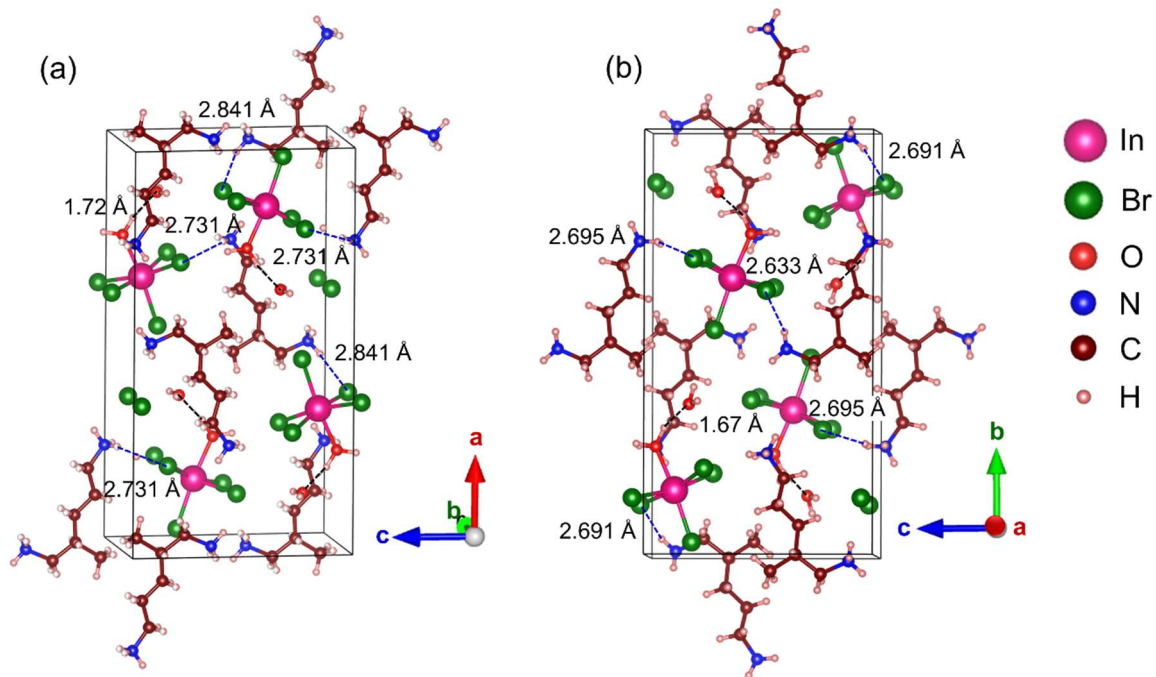

**Fig. S1.** Hydrogen bonding interactions in (5P1)InBr<sub>5</sub>·2H<sub>2</sub>O, at (a) 296 K, (b) 127 K.

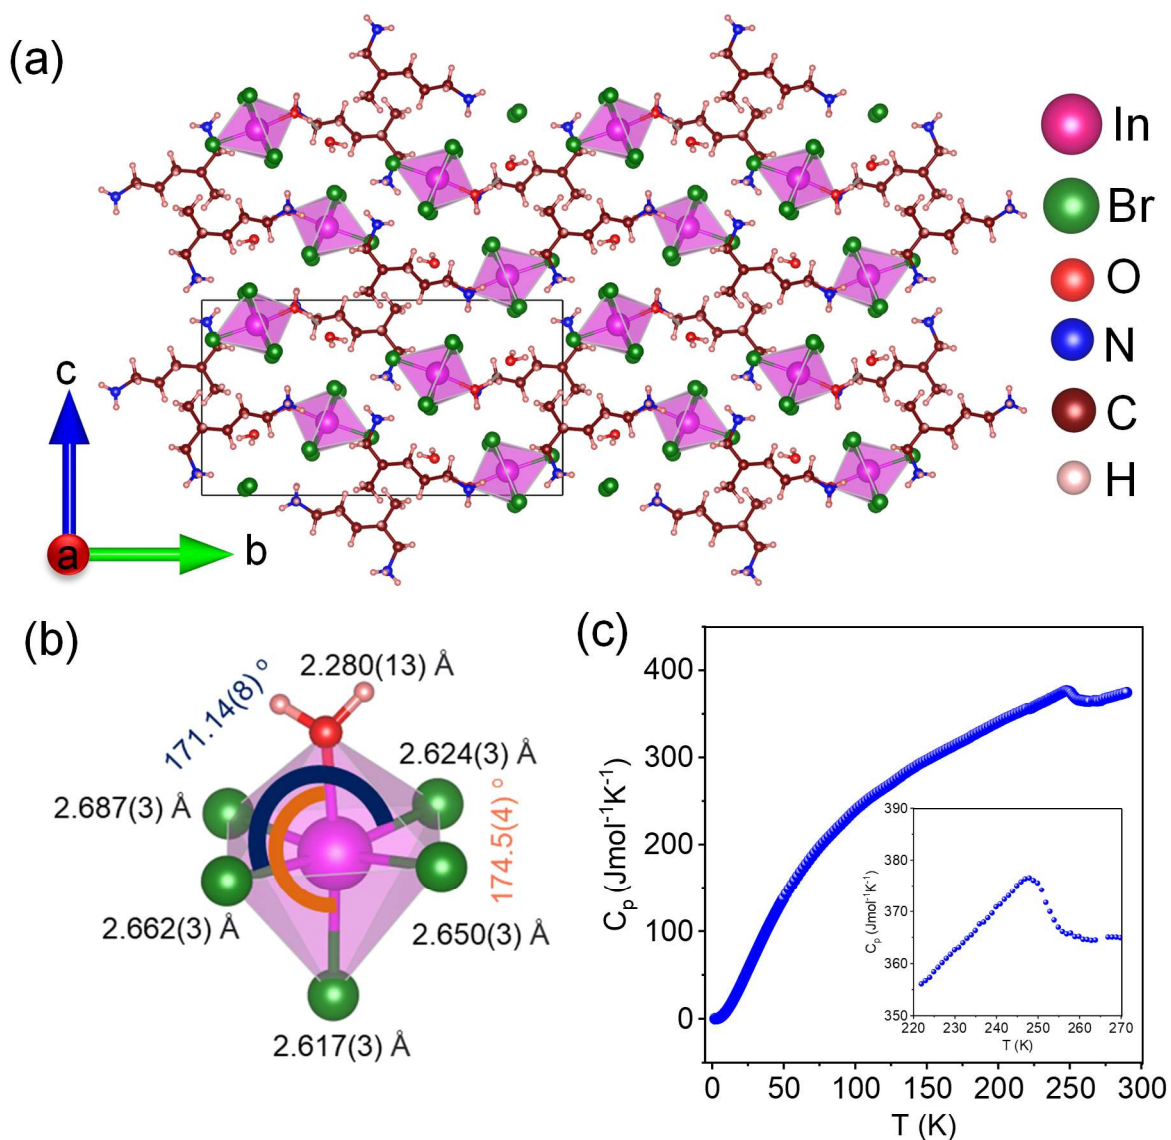

**Fig. S2.** (a) Low temperature (127 K) crystal structure of (5P1)InBr<sub>5</sub>·2H<sub>2</sub>O viewed along crystallographic *a*-axis. (b) Distorted [InBr<sub>5</sub>(H<sub>2</sub>O)]<sup>2-</sup> octahedron of (5P1)InBr<sub>5</sub>·2H<sub>2</sub>O at 127 K. (c) Temperature dependent  $C_p$  plot of (5P1)InBr<sub>5</sub>·2H<sub>2</sub>O. Inset of (c) demonstrates the phase transition at 250 K.

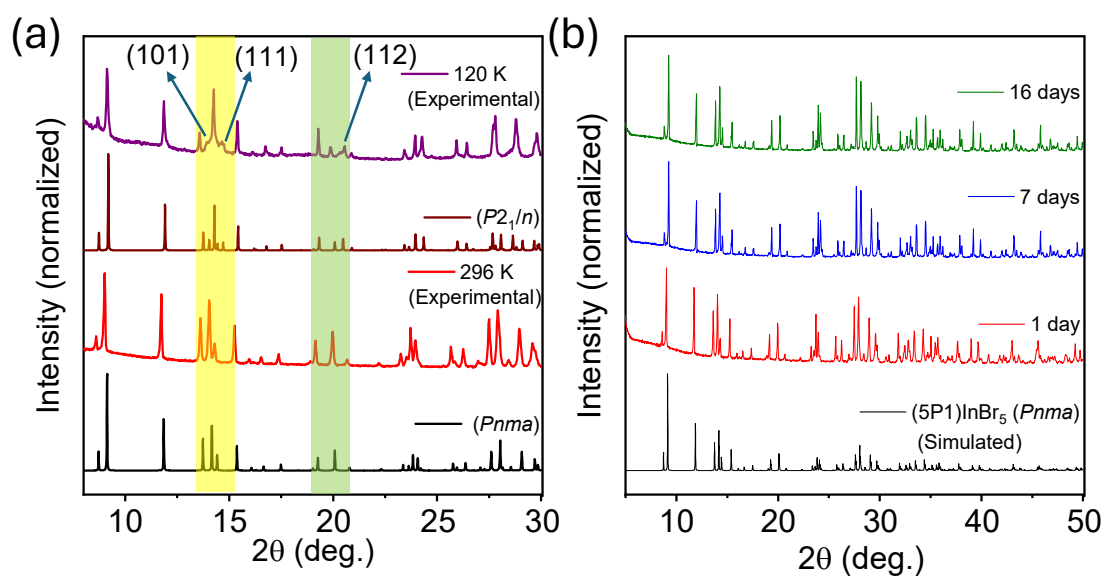

**Fig. S3.** (a) PXR D patterns at 120 K and 296 K of  $(5P1)InBr_5 \cdot 2H_2O$  along with respective simulated patterns (yellow and green highlighted part indicate changes in PXR D patterns). (b) Comparison of PXR D patterns of as-synthesized (1 day) and aged (7 days and 16 days)  $(5P1)InBr_5 \cdot 2H_2O$  sample.



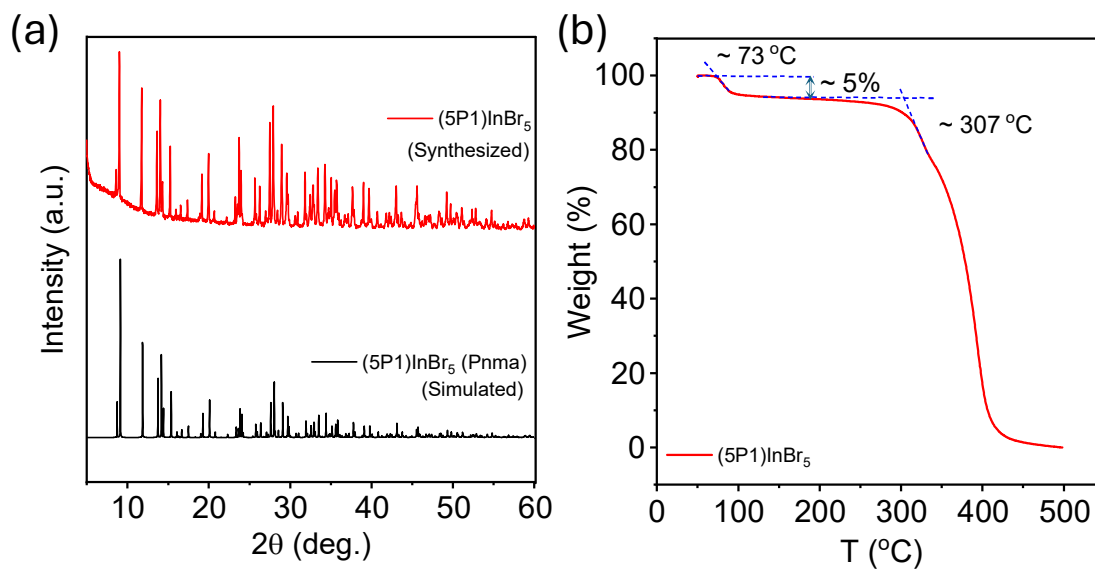

**Fig. S4.** (a) Comparison of PXRD patterns with the simulated patterns from SCXRD data for  $(5P1)InBr_5 \cdot 2H_2O$  at 296 K. (b) TGA plot of  $(5P1)InBr_5 \cdot 2H_2O$  showing 5 % weight loss due to loss of two water molecules.

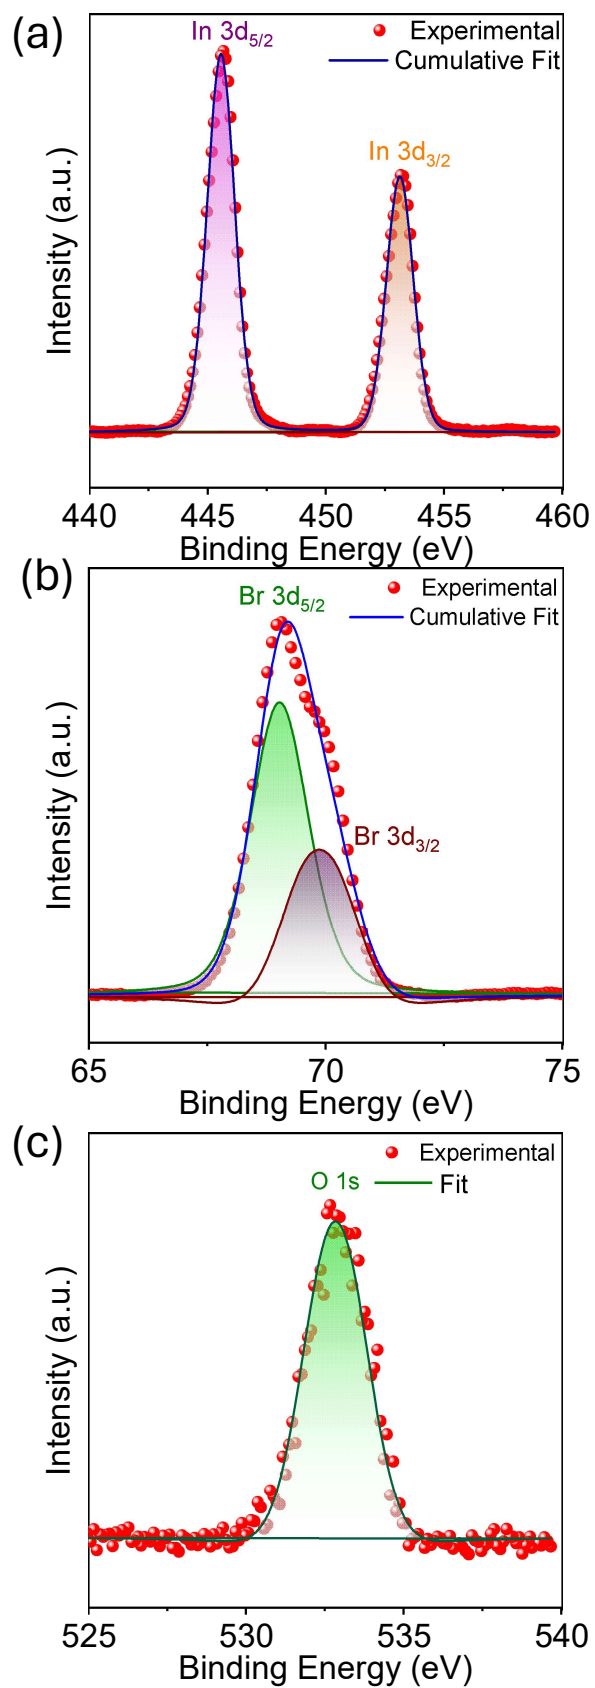

**Fig. S5.** XPS of (a) In 3d (b) Br 3d and (c) O 1s levels in (5P1)InBr<sub>5</sub>·2H<sub>2</sub>O sample.

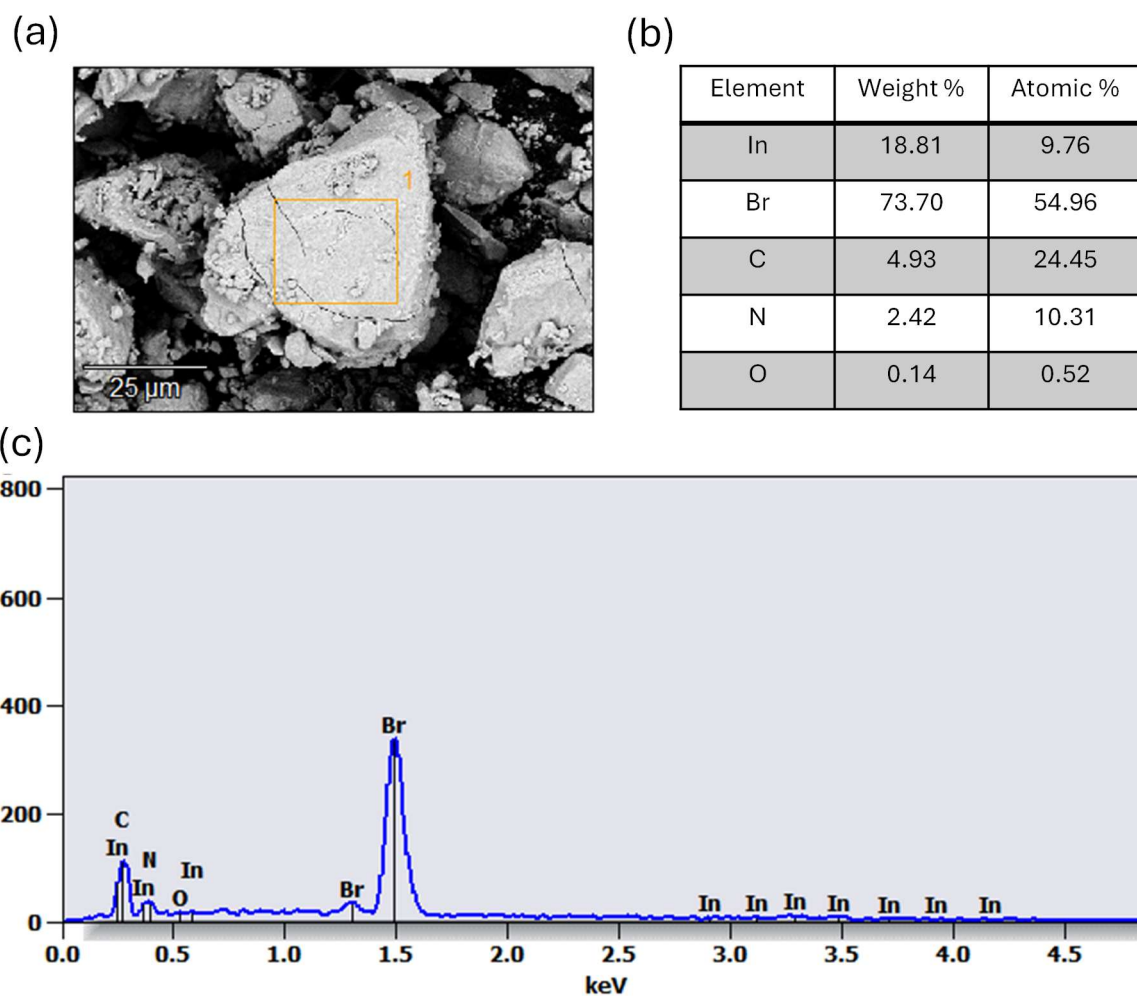

**Fig. S6.** (a) Backscattered FESEM image of  $(5P1)InBr_5 \cdot 2H_2O$ . (b) Weight and atomic percentage of In, Br, C, N, O atoms from the (c) EDX spectra of the marked area in (a) indicating Br/In ratio is  $\sim 5.63$ .

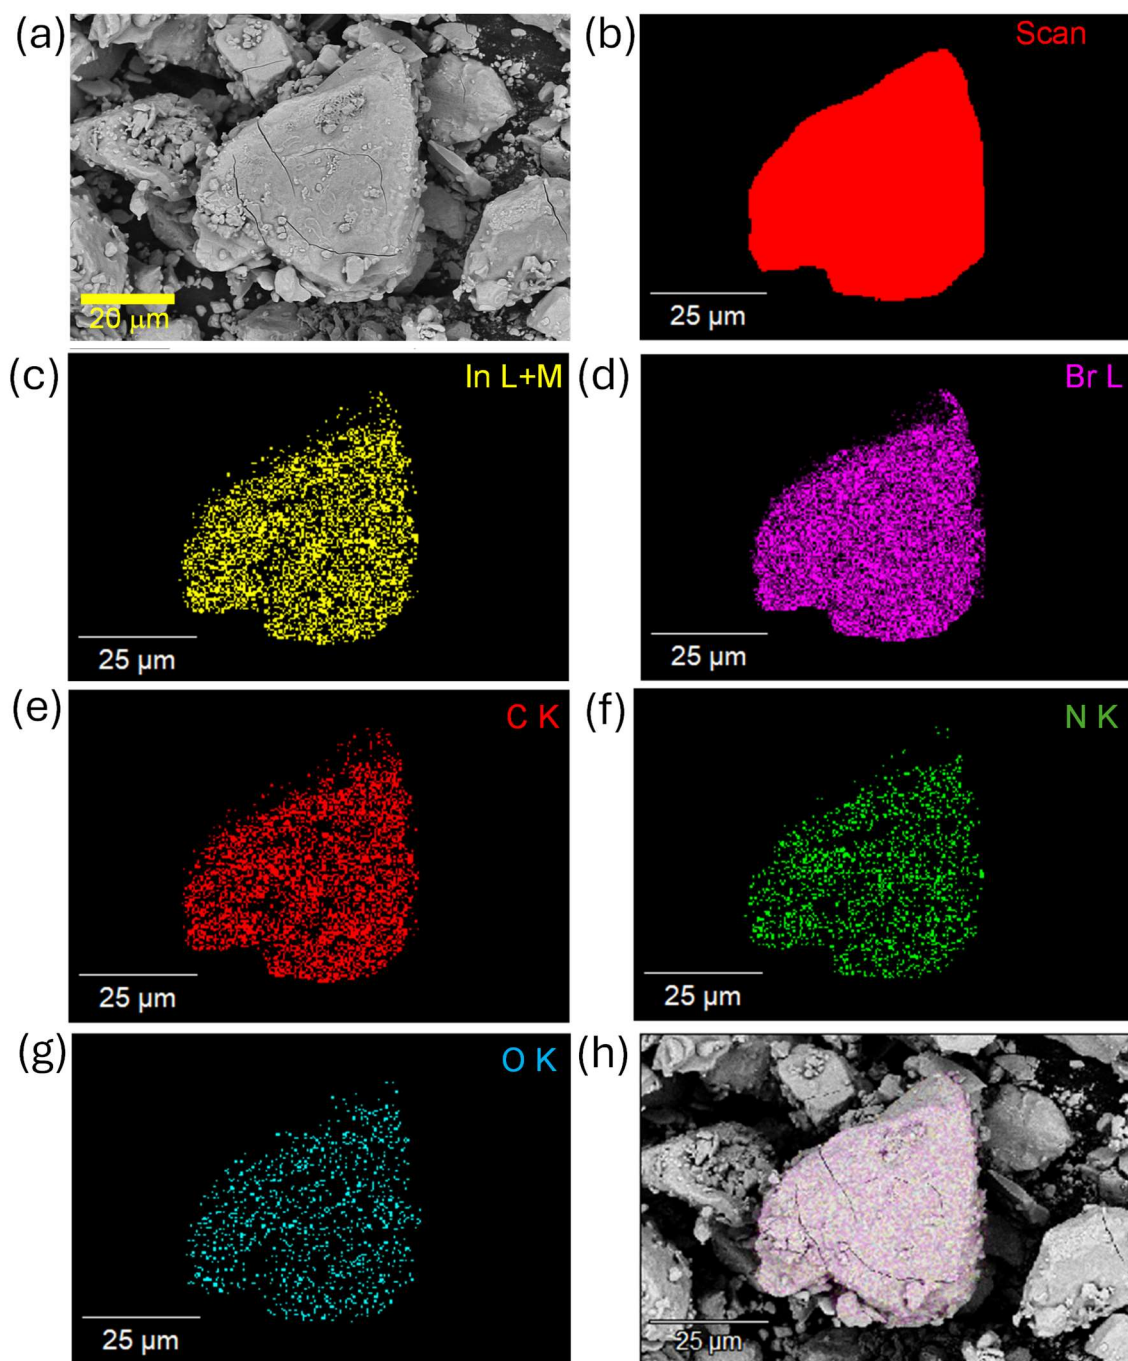

**Fig. S7.** (a) Backscattered FESEM image of grinded powder of  $(5P1)InBr_5 \cdot 2H_2O$ . (b) Scan area for EDAX mapping. EDAX colour mapping of (c) In L+M, (d) Br L, (e) C K, (f) N K, (g) O K and (h) overlapped mapping image showing homogeneous distribution of all the elements.

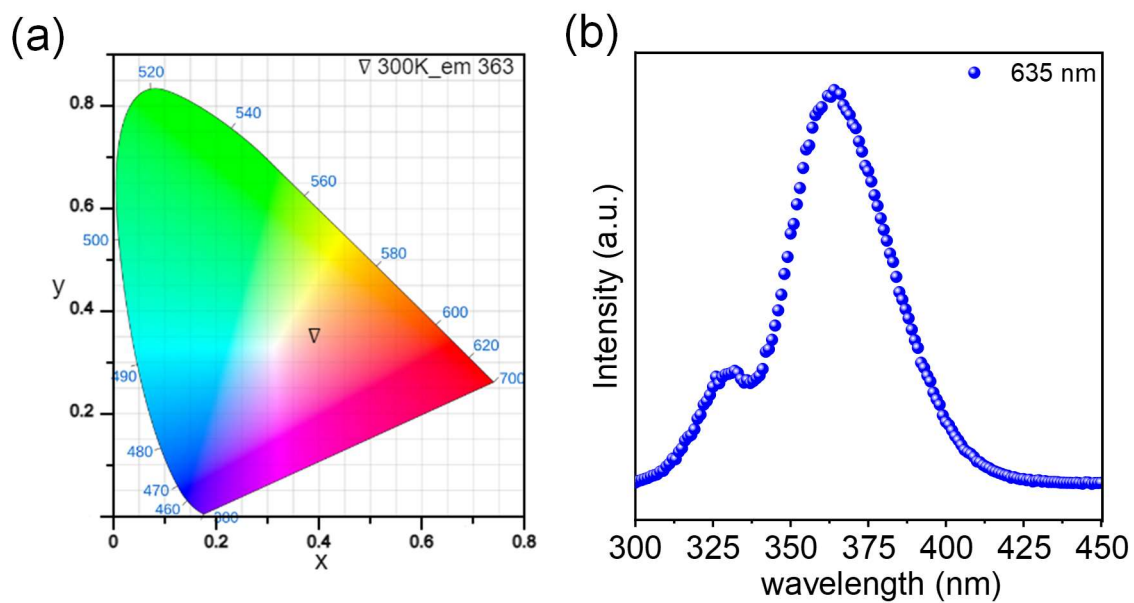

**Fig. S8.** (a) Chromaticity coordinate of  $(5P1)InBr_5 \cdot 2H_2O$  plotted on the CIE1931 chromaticity chart. (b) Photoluminescence excitation (PLE) spectra of  $(5P1)InBr_5 \cdot 2H_2O$  for STE emission.

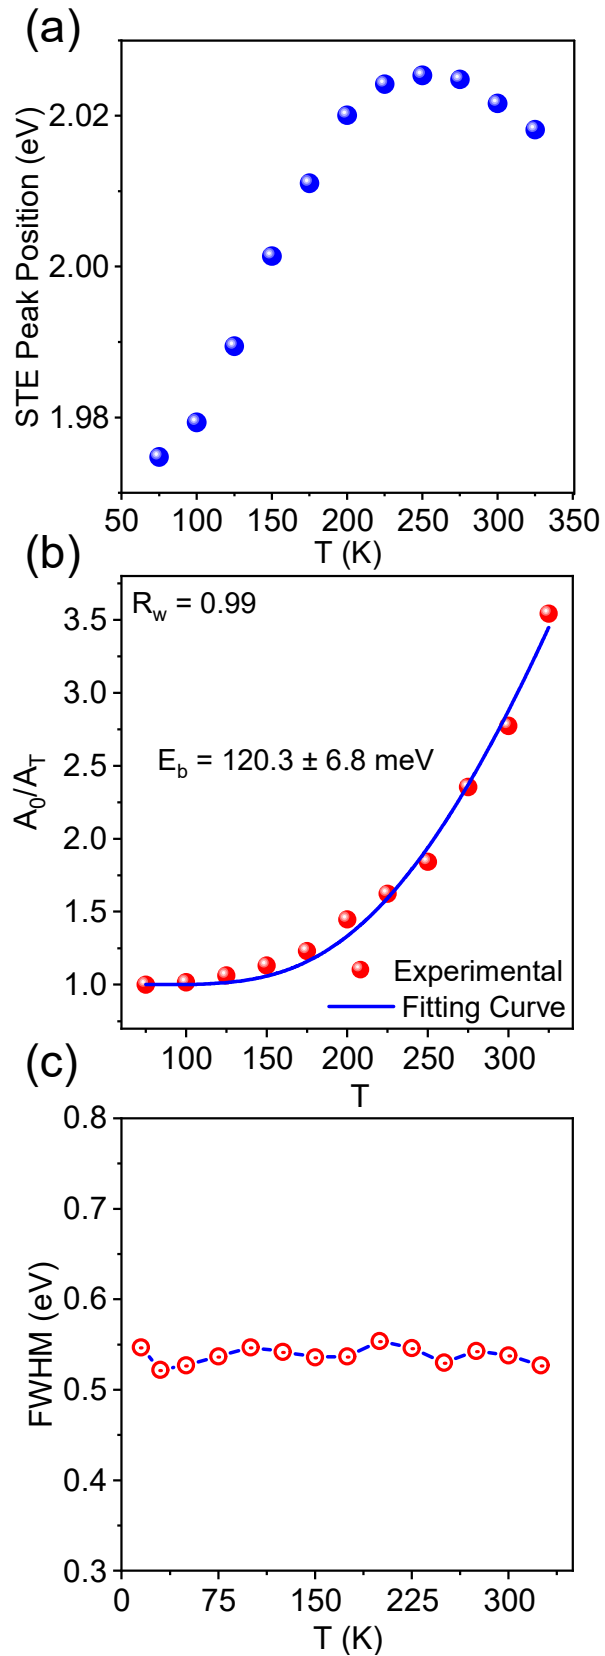

**Fig. S9.** (a) Variation of STE peak position (in eV) with temperature (b) Fitted plot of  $A_0/A_T$  vs  $T$  for calculation of exciton binding energy ( $E_b$ ), (c) variation of FWHM of FE peak with temperature.

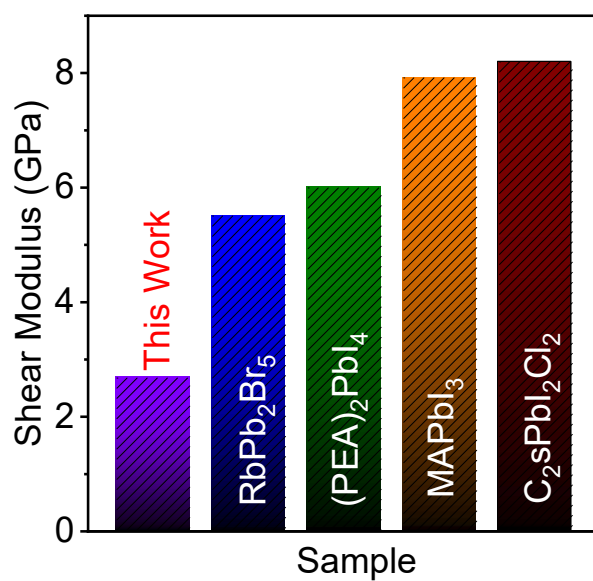

**Fig. S10.** Comparison of shear modulus (G) of (5P1)InBr<sub>5</sub>·2H<sub>2</sub>O, with some of the other hybrid and all-inorganic metal halides like RbPb<sub>2</sub>Br<sub>5</sub>,<sup>S9</sup> Cs<sub>2</sub>PbI<sub>2</sub>Cl<sub>2</sub>,<sup>S10</sup>, (PEA)<sub>2</sub>PbI<sub>4</sub>,<sup>S11</sup> and MAPbI<sub>3</sub>.<sup>S11</sup>

**Table S1:** Crystal structure data and refinement parameters from single crystal X-ray diffraction for (5P1)InBr<sub>5</sub>·2H<sub>2</sub>O (at 296 K) and LT-(5P1)InBr<sub>5</sub>·2H<sub>2</sub>O (at 127 K).

| Empirical formula                                   | <b>C<sub>6</sub>H<sub>18</sub>N<sub>2</sub>InBr<sub>5</sub>·2H<sub>2</sub>O</b> | <b>C<sub>6</sub>H<sub>18</sub>N<sub>2</sub>InBr<sub>5</sub>·2H<sub>2</sub>O</b> |
|-----------------------------------------------------|---------------------------------------------------------------------------------|---------------------------------------------------------------------------------|
| Formula weight (g/mol)                              | 668.62                                                                          | 668.62                                                                          |
| Temperature (K)                                     | 296(2)                                                                          | 127(2)                                                                          |
| Crystal system                                      | Orthorhombic                                                                    | Monoclinic                                                                      |
| Space group                                         | <i>Pnma</i>                                                                     | <i>P2<sub>1</sub>/n</i>                                                         |
| Unit cell dimensions                                |                                                                                 |                                                                                 |
| <i>a</i> (Å)                                        | 20.264(3)                                                                       | 7.8333(13)                                                                      |
| <i>b</i> (Å)                                        | 7.9353(11)                                                                      | 20.223(3)                                                                       |
| <i>c</i> (Å)                                        | 11.0226(13)                                                                     | 10.9317(17)                                                                     |
| $\alpha$ (°)                                        | 90                                                                              | 90                                                                              |
| $\beta$ (°)                                         | 90                                                                              | 91.232(7)                                                                       |
| $\gamma$ (°)                                        | 90                                                                              | 90                                                                              |
| Volume (Å <sup>3</sup> )                            | 1772.4(4)                                                                       | 1731.3(5)                                                                       |
| <i>Z</i>                                            | 4                                                                               | 4                                                                               |
| Density (calc) (g/cm <sup>3</sup> )                 | 2.506                                                                           | 2.565                                                                           |
| F(000)                                              | 1248                                                                            | 1248                                                                            |
| $\theta$ range for data collection (°)              | 2.731-27.142                                                                    | 2.601-27.352                                                                    |
| Index ranges                                        | -25 ≤ <i>h</i> ≤ 26,<br>-10 ≤ <i>k</i> ≤ 10,<br>-14 ≤ <i>l</i> ≤ 14,            | -10 ≤ <i>h</i> ≤ 10,<br>-25 ≤ <i>k</i> ≤ 25,<br>-14 ≤ <i>l</i> ≤ 14,            |
| Reflections collected                               | 62850                                                                           | 34407                                                                           |
| Independent reflections                             | 2102<br>[ <i>R</i> <sub>int</sub> = 0.0626]                                     | 3854<br>[ <i>R</i> <sub>int</sub> = 0.0803]                                     |
| Completeness (%)                                    | 99.9                                                                            | 99.8                                                                            |
| Refinement method                                   | <i>full-matrix least-squares on F<sup>2</sup></i>                               |                                                                                 |
| Final R indices<br>[ <i>I</i> > 2σ( <i>I</i> )]     | <i>R</i> <sub>obs</sub> = 0.0304,<br><i>wR</i> <sub>obs</sub> = 0.0839          | <i>R</i> <sub>obs</sub> = 0.0856,<br><i>wR</i> <sub>obs</sub> = 0.2492          |
| Largest diff. peak and hole<br>(e·Å <sup>-3</sup> ) | 1.23 and -1.67                                                                  | 3.70 and -1.39                                                                  |
| GoF                                                 | 1.040                                                                           | 1.078                                                                           |
| CCDC no.                                            | 2348109                                                                         | 2348112                                                                         |



**Table S2.** Hydrogen bond distances for (5P1)InBr<sub>5</sub>·2H<sub>2</sub>O at 296 K and 127K.

| Hydrogen bond (Å) | 296 K   | 127 K   |
|-------------------|---------|---------|
| N-H···Br bond     | 2.731 Å | 2.633 Å |
|                   | 2.841 Å | 2.691 Å |
|                   |         | 2.695 Å |
| O-H···O bond      | 1.72 Å  | 1.67 Å  |

**Table S3.** Bond distortion level ( $\lambda_{\text{oct}}$ ) and bond angle variance ( $\sigma^2$ ) at different temperatures.

| Material                       | $\lambda_{\text{oct}}$ | $\sigma^2$ |
|--------------------------------|------------------------|------------|
| (5p1)InBr <sub>5</sub> (298 K) | $2.68 \times 10^{-3}$  | 20.175     |
| (5p1)InBr <sub>5</sub> (127 K) | $2.89 \times 10^{-3}$  | 20.153     |

**Table S4.** Fitting parameters of low-temperature heat capacity according to Debye +3 Einstein modes.

| Parameter                                      | Value                  |
|------------------------------------------------|------------------------|
| $\gamma$ (Jmol <sup>-1</sup> K <sup>-2</sup> ) | 0.034                  |
| $\beta$ (Jmol <sup>-1</sup> K <sup>-4</sup> )  | $6.516 \times 10^{-4}$ |
| $\Theta_{E1}$ (K)                              | 23                     |
| $\Theta_{E2}$ (K)                              | 49                     |
| $\Theta_{E3}$ (K)                              | 99                     |
| $\Theta_D$ (K)                                 | 138                    |

**Table S5.** Measured sound velocity and related parameters for (5P1)InBr<sub>5</sub>·2H<sub>2</sub>O.

| Parameter                         | Experimental value |
|-----------------------------------|--------------------|
| Longitudinal sound velocity (m/s) | 2237               |
| Transverse sound velocity (m/s)   | 1035               |
| Mean sound velocity (m/s)         | 1166               |
| Poisson's ratio                   | 0.36               |
| Debye temperature (K)             | 146                |
| Gruneisen parameter               | 2.25               |
| Bulk modulus (GPa)                | 8.96               |
| Shear modulus (GPa)               | 2.68               |

## References:

- S1. G. M. Sheldrick, *Acta. Cryst.*, 2008, **64**, 112-122.
- S2. G. M. Sheldrick, *Acta. Cryst.* 2015, **71**, 3-8.
- S3 L. J.Farrugia, *J.Appl. Cryst.*1999, **32**, 837-838.
- S4. A. Mandal, S. Gupta, S. Dutta, S. K. Pati and S. Bhattacharyya, *Chem. Sci.*, 2023, **14**, 9770–9779.
- S5. R. Pathak, D. Sarkar and K. Biswas, *Angew. Chem. Int. Ed.*, 2021, **60**, 17686-17692.
- S6. B. Ai, C. Liu, Z. Deng, J. Wang, J. Han, X. Zhao, *Phys. Chem. Chem. Phys.* **2017**, *19*, 17349–17355.
- S7. A. Bhui, S. Das, R. Arora, U. Bhat, P. Dutta, T. Ghosh, R. Pathak, R. Datta, U. V. Waghmare and K. Biswas, *J. Am. Chem. Soc.*, 2023, **145**, 25392-25400.
- S8. R. Pathak, P. Dutta, A. Srivastava, D. Rawat, R. K. Gopal, A. K. Singh, A. Soni and K. Biswas, *Angew. Chem. Int. Ed.*, 2022, **61**, e202210783.
- S9. J. Pradhan, A. Das, K. Kundu, Chahat and K. Biswas, *Chem. Sci.*, 2022, **13**, 9952-9959.
- S10. P. Acharyya, T. Ghosh, K. Pal, K. Kundu, K. Singh Rana, J. Pandey, A. Soni, U. V. Waghmare and K. Biswas, *J. Am. Chem. Soc.*, 2020, **142**, 15595-15603.
- S11. S. Rathore, W. L. Leong and A. Singh, *J. Alloys Compd.*, 2023, **936**, 168328.
